# Supplementary material for: Template-free solvothermal preparation of ternary FeNi2S4 hollow balloons as RuO2-like efficient electrocatalysts for the oxygen evolution reaction with superior stability
Source: Royal Society of Chemistry journal article supplement (doi:10.1039/c8ta06051g), 2018-01-01
Supplement: c8ta06051g1.pdf [file c8ta06051g1.pdf]

## Electronic Supplementary Information

### Template-free solvothermal preparation of ternary hollow balloons as RuO<sub>2</sub>-like efficient electrocatalysts for oxygen evolution reaction with superior stability

He Wang<sup>1</sup>, Jianhua Tang<sup>1</sup>, Yinle Li<sup>1</sup>, Hang Chu<sup>1</sup>, Yuancai Ge<sup>1</sup>, Robert Baines<sup>2</sup>, Pei Dong<sup>2</sup>, Pulickel M. Ajayan<sup>2</sup>, Jianfeng Shen<sup>1\*</sup>, Mingxin Ye<sup>1\*</sup>

<sup>1</sup> Institute of Special Materials and Technology, Fudan University, 200433, Shanghai, China. E-mail: mxye@fudan.edu.cn

<sup>2</sup> Department of Materials Science and NanoEngineering, Rice University, 6100 Main Street, Houston, TX 77005, USA.

\*Corresponding author. Email: jfshen@fudan.edu.cn; mxye@fudan.edu.cn

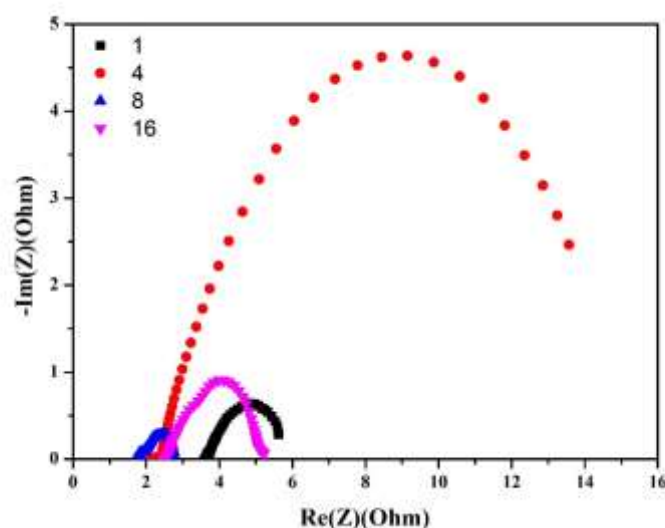

**Figure S1.** Nyquist plots of 1h-FNSH, 4h-FNSH, 8h-FNSH and 16h-FNSH electrodes recorded at an applied potential of 0.5 V with a frequency range of 100 kHz to 100 mHz in 1 M KOH

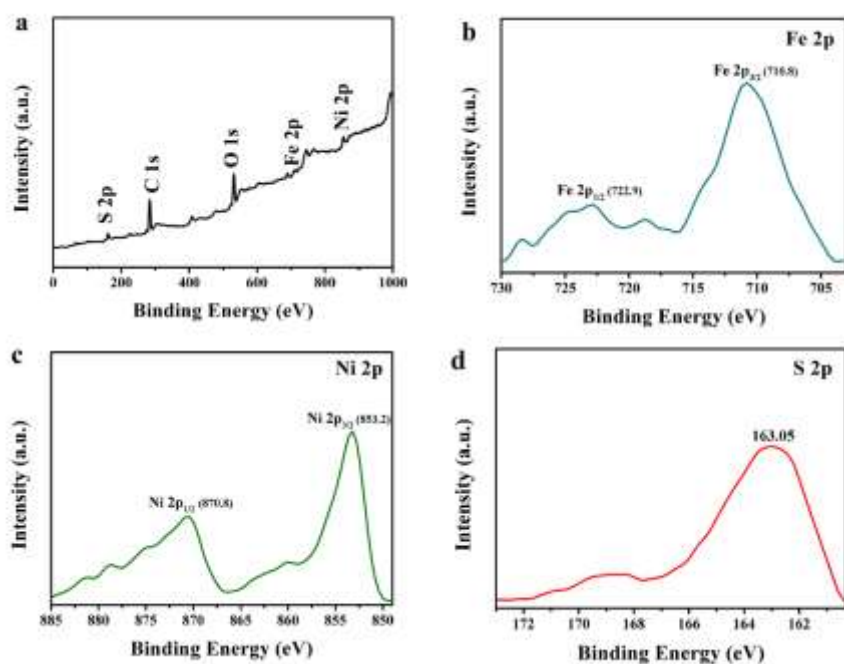

**Figure S2.** XPS survey spectra (a) of FNSH and the XPS spectra of Fe 2p (b), Ni 2p (c), and S 2p (d) for FNSH.

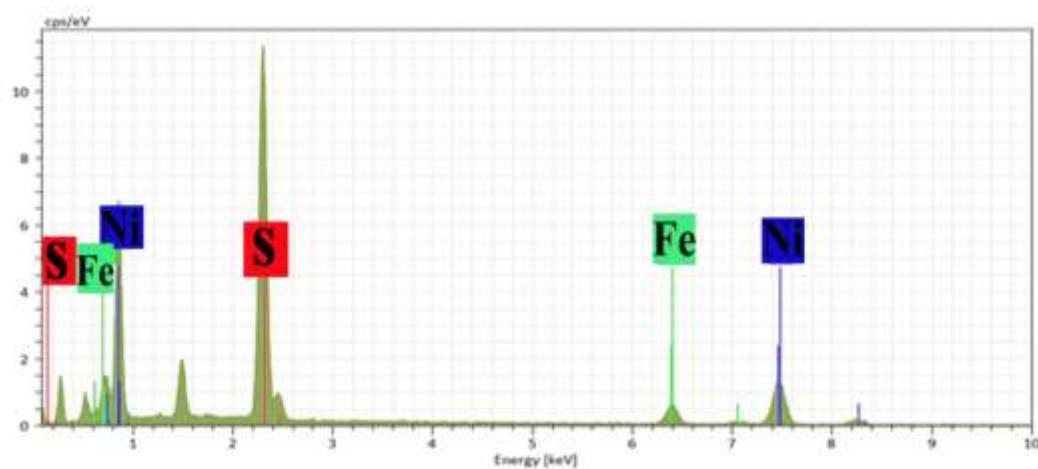

**Figure S3.** EDX patterns of FNSH

**Table S1.** Quantification results of EDX of FNSH

| Sample | Concentration (at. %) |       |       |
|--------|-----------------------|-------|-------|
|        | Fe                    | Ni    | S     |
| FNSH   | 15.11                 | 29.54 | 55.34 |

**Table S2.** ICP-OES result of FNSH

| Sample | Concentration ( $\mu\text{M}$ ) |        |
|--------|---------------------------------|--------|
|        | Fe                              | Ni     |
| FNSH   | 20.525                          | 42.032 |

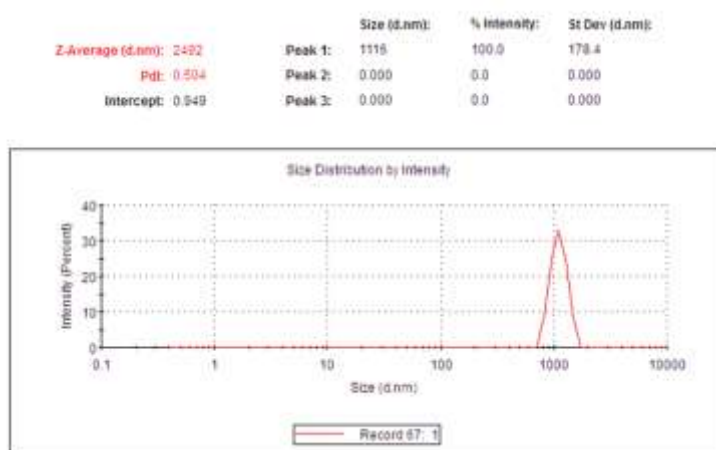

**Figure S4.** DLS result of 8h-FNSH.

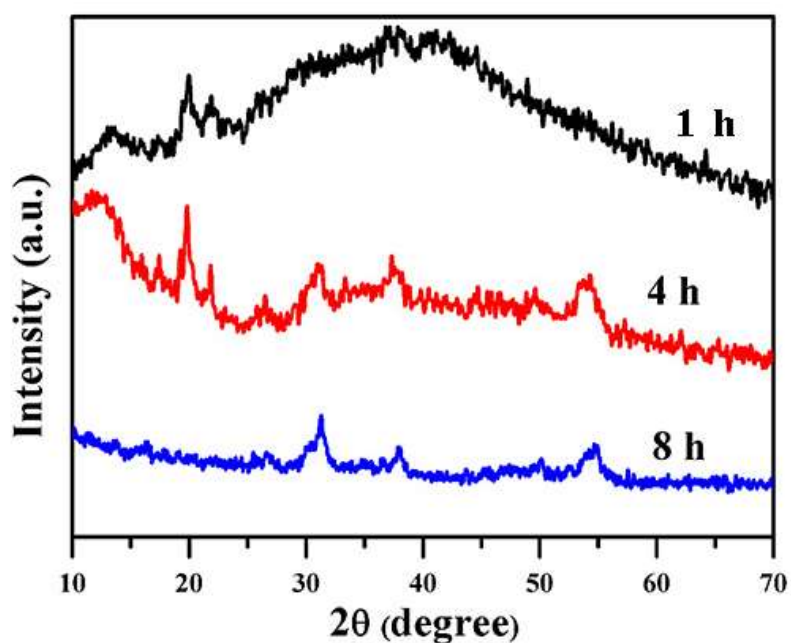

**Figure S5.** XRD patterns of FNS obtained with reaction time 1 h, 4 h and 8 h.

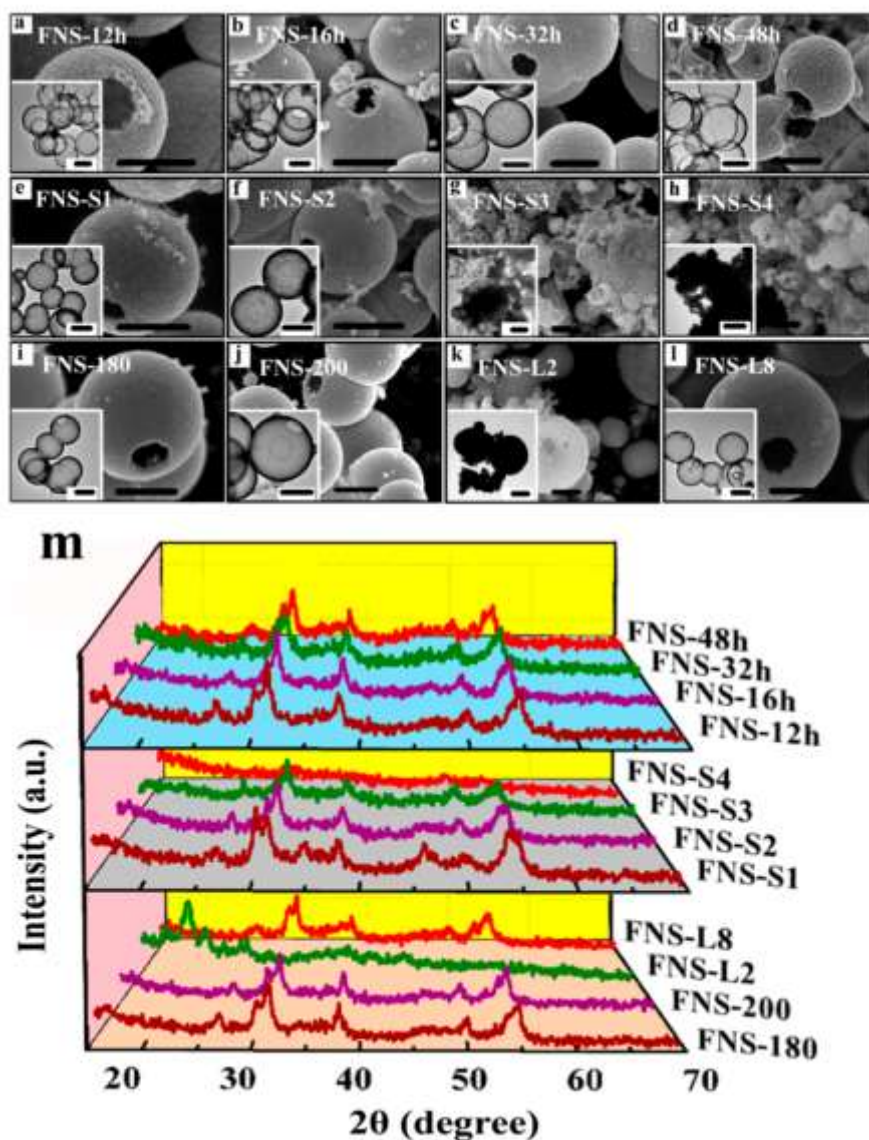

**Figure S6.** SEM and the corresponding TEM images (inset in the SEM images) of FNS obtained with different reaction times (a) 12 h, (b) 16 h, (c) 32 h, (d) 48 h; varying ratios of water-glycol (e) 1:0, (f) 2:1, (g) 1:2, (h) 0:1; different reaction temperatures (i) 180 °C, (j) 200 °C; multiple amounts of L-cysteine (k) 0.04 mol/L, (l) 0.16 mol/L;. Scale bars shown in all of the SEM and TEM images correspond to 2.0  $\mu\text{m}$ . XRD patterns of different FNS samples (m)

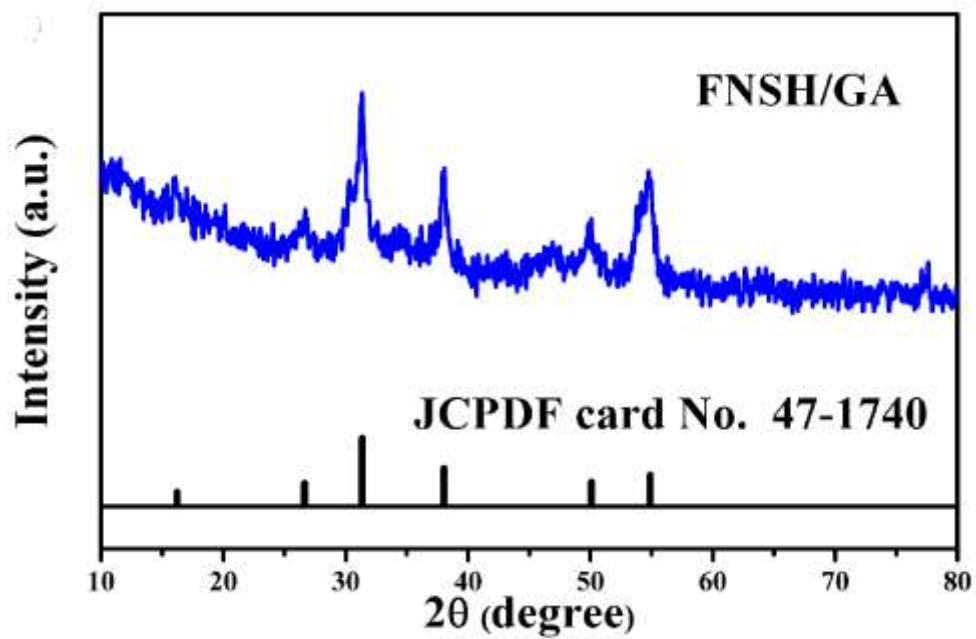

**Figure S7.** XRD pattern of FNSH/GA.

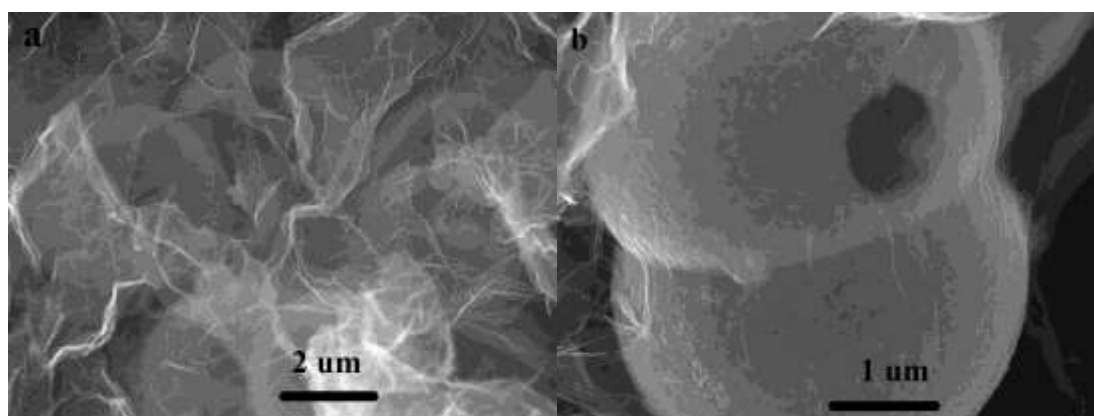

**Figure S8.** SEM images of FNSH/GA.

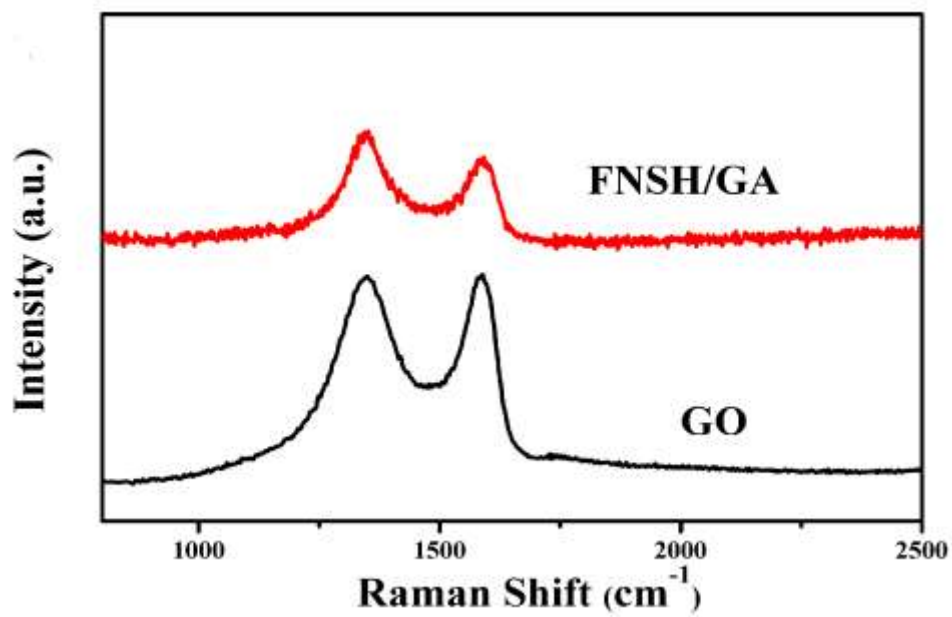

Figure S9. Raman spectrum of FNSH/GA.

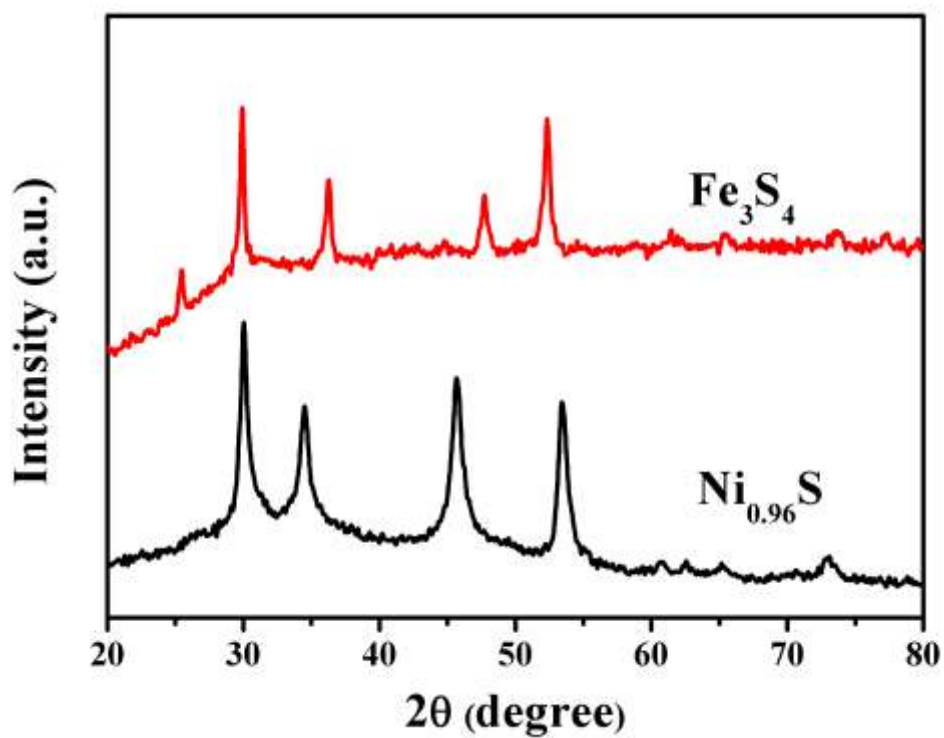

Figure S10. XRD patterns of Ni<sub>0.96</sub>S and Fe<sub>3</sub>S<sub>4</sub>.

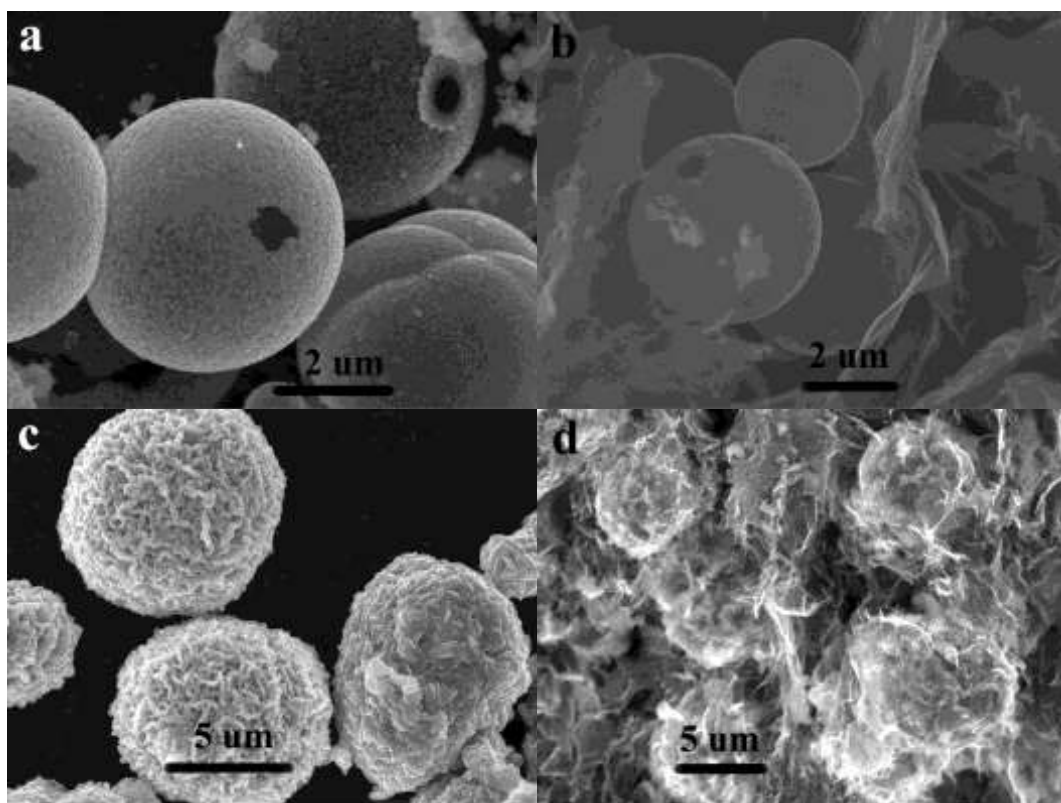

**Figure S11.** SEM images of Ni<sub>0.96</sub>S (a), Ni<sub>0.96</sub>S/GA (b), Fe<sub>3</sub>S<sub>4</sub> (c) and Fe<sub>3</sub>S<sub>4</sub>/GA (d).

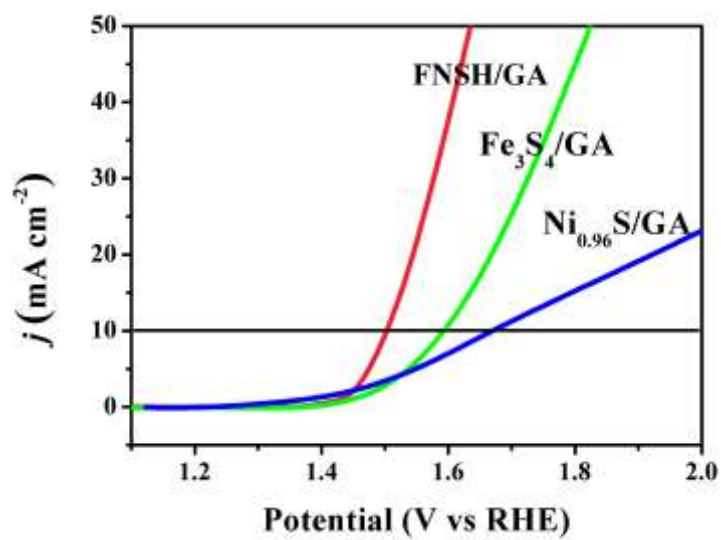

**Figure S12.** polarization curves of FNSH/GA, Fe<sub>3</sub>S<sub>4</sub>/GA, NiS/GA at 5 mV s<sup>-1</sup>

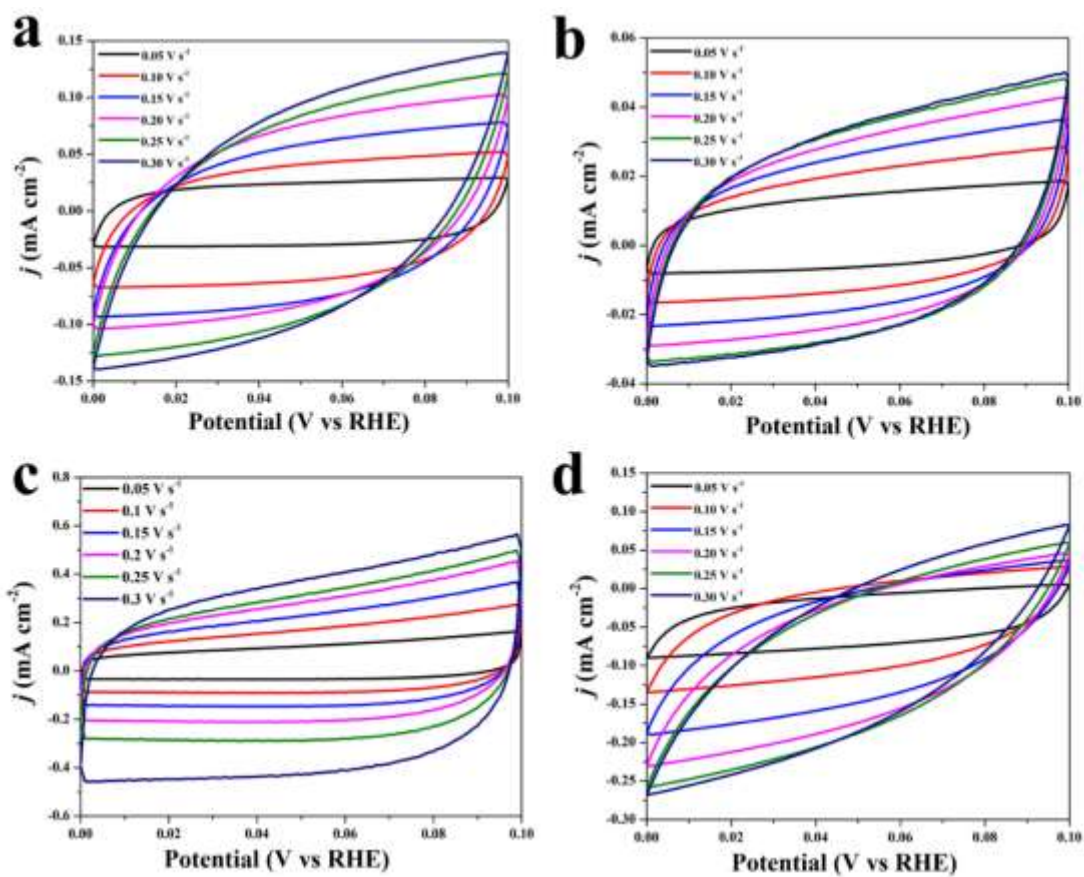

**Figure S13.** CV for  $\text{FeNi}_2\text{S}_4$  under different reaction time, including (a) 1 h, (b) 4 h, (c) 8 h, (d) 16 h, with a scan rate of 0.05, 0.1, 0.15, 0.2, 0.25 and  $0.3 \text{ V s}^{-1}$  in 1.0 M KOH at the potential from 0 to 0.5 V.

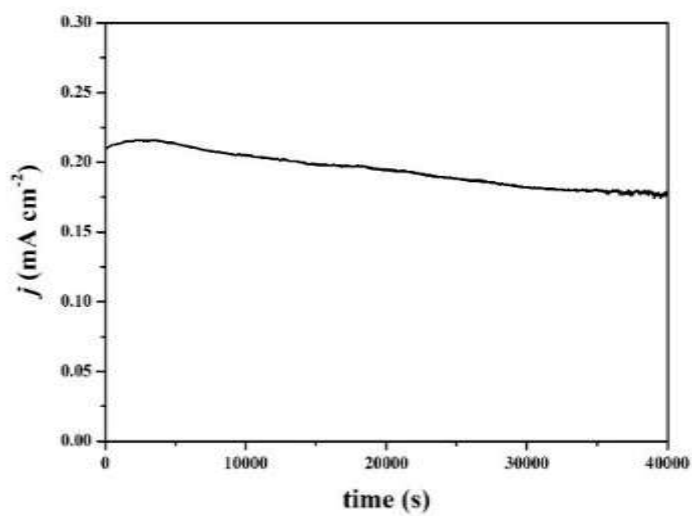

**Figure S14.** Durability tests for 8 h FNSH/GA at  $10 \text{ mA cm}^{-2}$ .



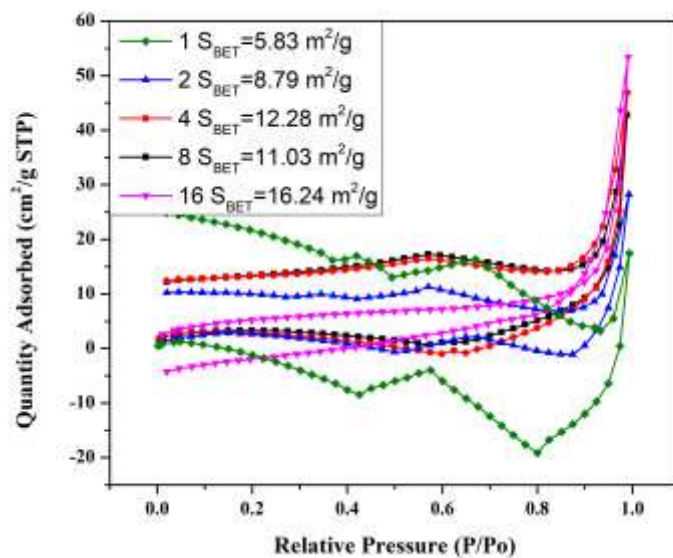

**Figure S15.** N<sub>2</sub> adsorption-desorption isotherms of different products under different reaction time, including 1 h, 2 h, 4 h, 8 h and 16 h.

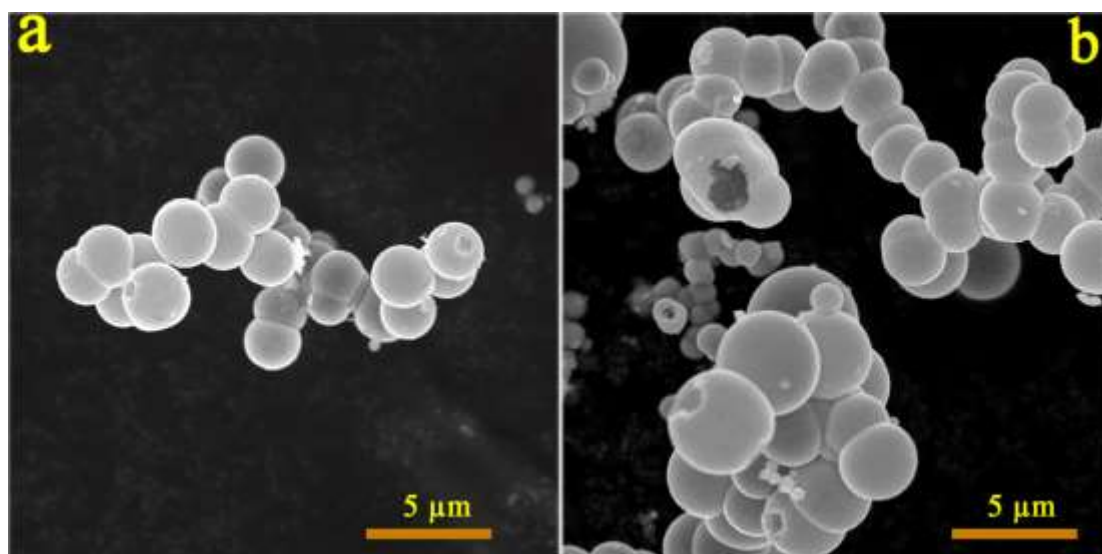

**Figure S16.** SEM images of CuCo<sub>2</sub>S<sub>4</sub> (a) and CoNi<sub>2</sub>S<sub>4</sub> (b)

#### References:

- [1]. H. Chen, J. Jiang, L. Zhang, H. Wan, T. Qi and D. Xia, *Nanoscale.*, 2013, **5**, 8879.
